# Supplementary material for: Franck–Condon simulations of transition-state spectra for the OH + H2O and OD + D2O reactions
Source: Royal Society of Chemistry journal article supplement (doi:10.1039/d0cp03681a), 2020-01-01
Supplement: d0cp03681a1.pdf [file d0cp03681a1.pdf]

## **Electronic Supplementary Information**

### **Franck–Condon simulations of transition state spectra for the OH + H<sub>2</sub>O and OD + D<sub>2</sub>O reactions**

Yutaro Sugiura and Toshiyuki Takayanagi\*

Department of Chemistry, Saitama University, 255 Shimo-Okubo, Sakura-ku, Saitama City, Saitama 338-8570, Japan

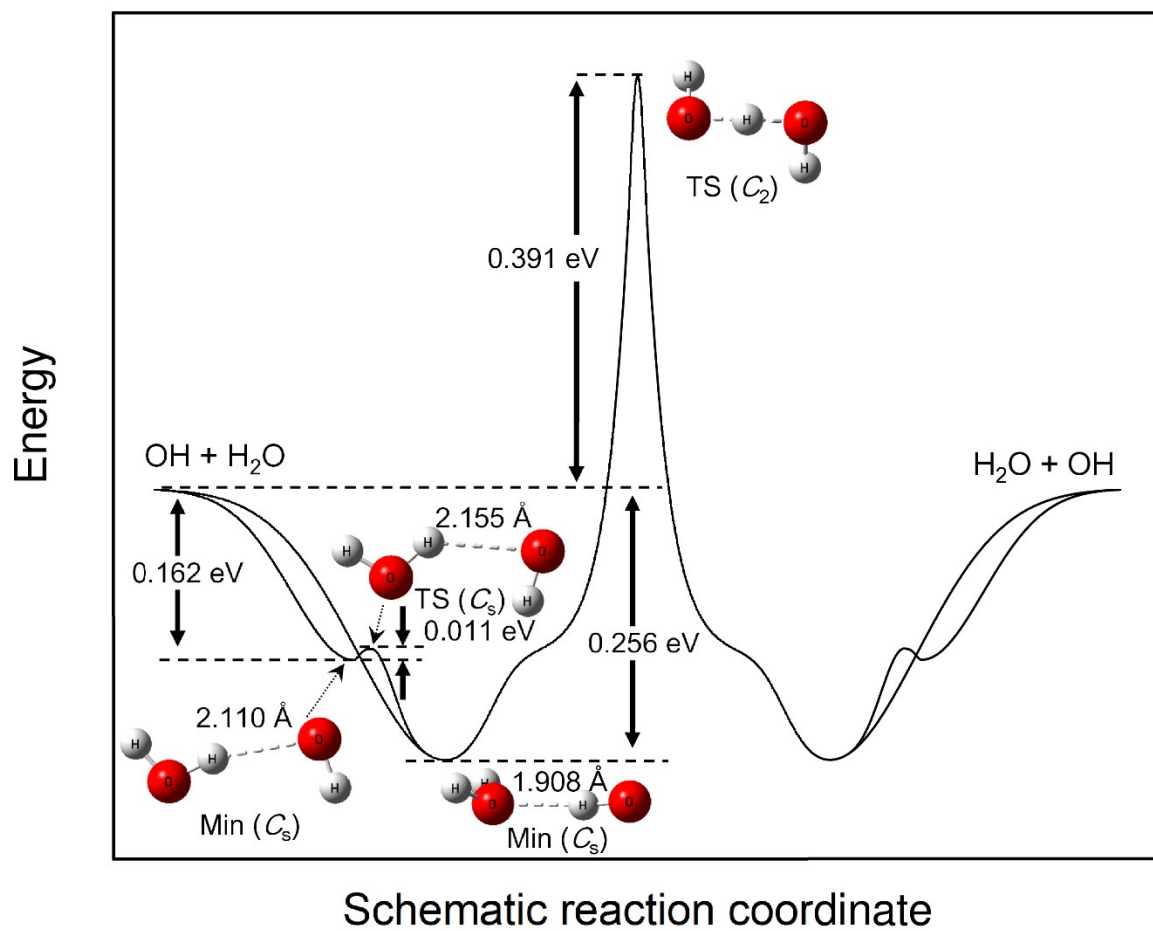

**Figure S1**

Schematic energy diagram of the neutral H<sub>3</sub>O<sub>2</sub> reaction system. Energies at stationary points are obtained from the *ab initio*-level PIP-NN potential energy surface employed in the present study.

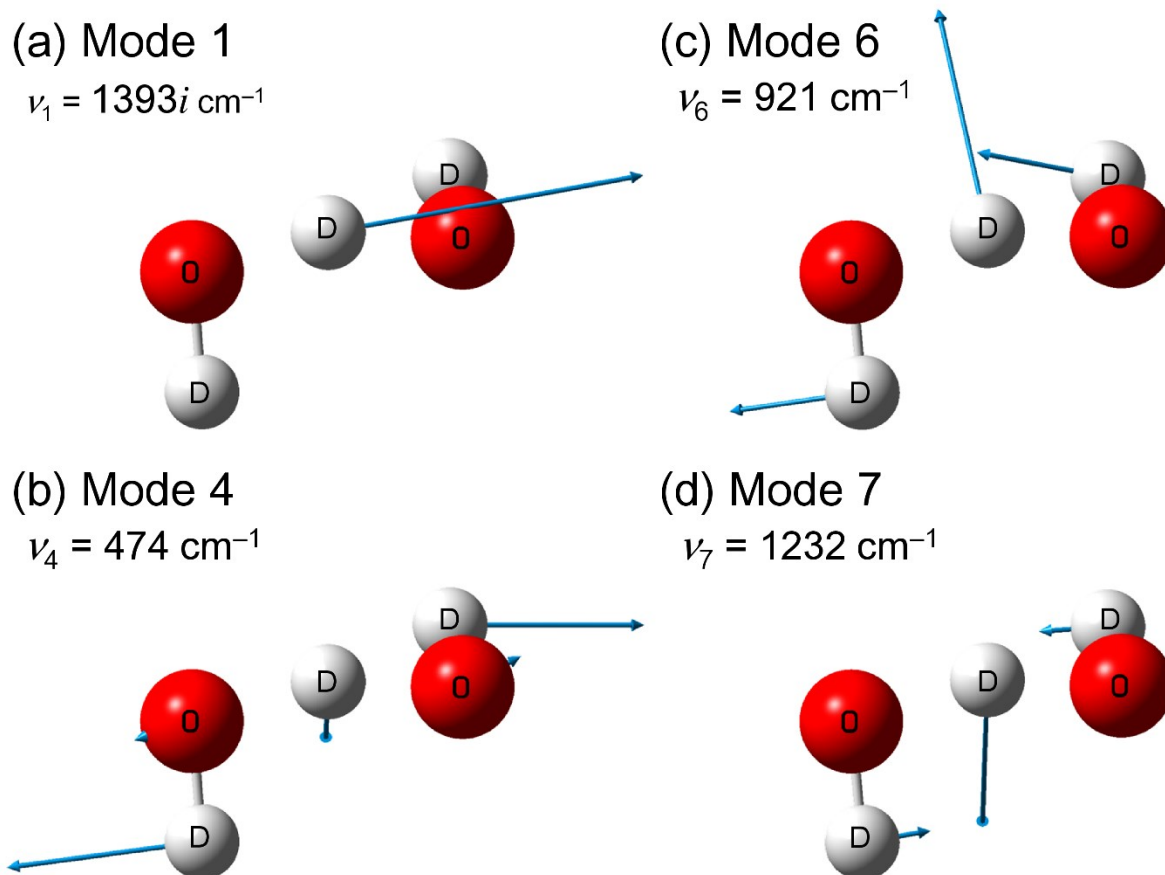

**Figure S2**

Normal-mode coordinates used in the quantum dynamics calculations as active nuclear degrees of freedom, obtained from vibrational frequency analysis of the  $C_2$  transition-state structure for the  $\text{OD} + \text{D}_2\text{O} \rightarrow \text{D}_2\text{O} + \text{OD}$  reaction. Mode 1 corresponds to the vibrational mode with an imaginary frequency.

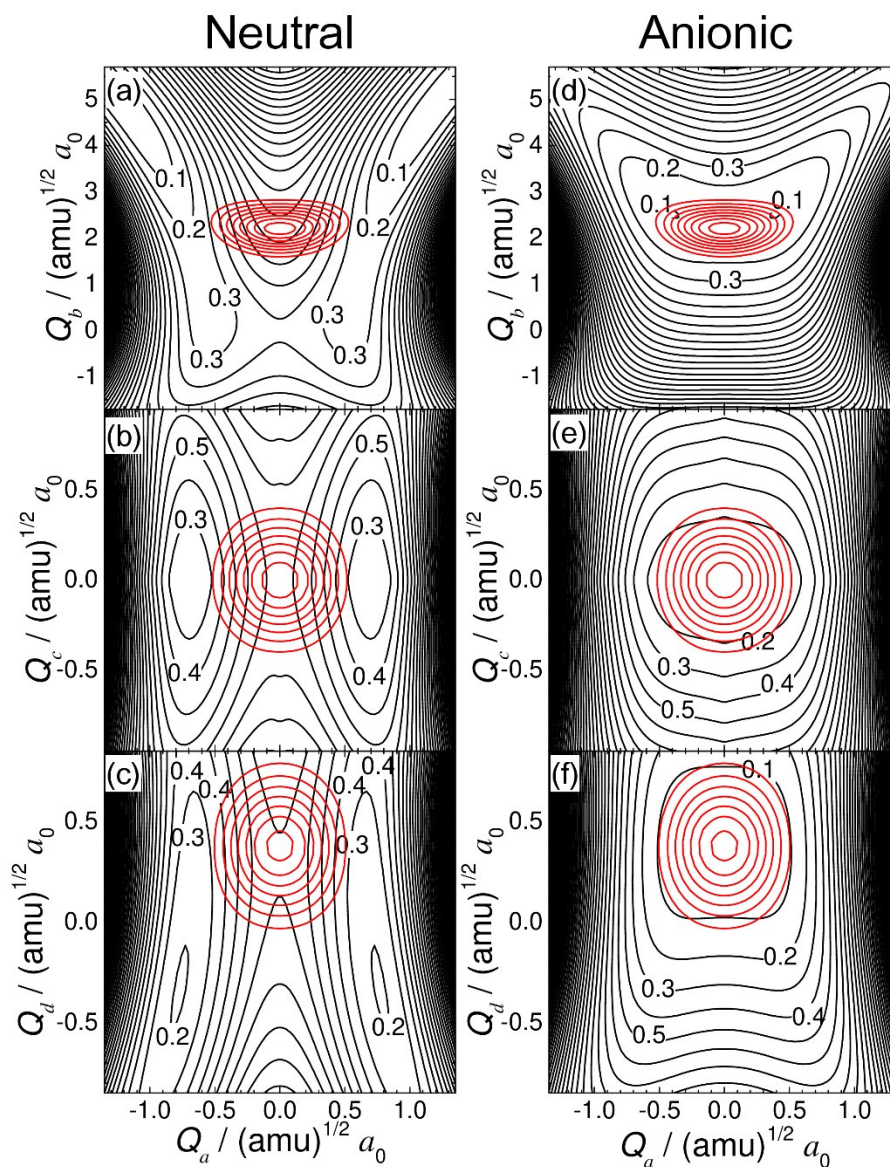

**Figure S3**

Two-dimensional contour plots of the potential energy surfaces of  $\text{D}_3\text{O}_2$  and  $\text{D}_3\text{O}_2^-$ . The contour increment was set to 0.1 eV. Left and right panels show the neutral and anionic potential energy surfaces, respectively. Panels (a) and (d) depict the surfaces plotted as a function of  $Q_a$  and  $Q_b$ . Panels (b) and (e) depict the surfaces plotted as a function of  $Q_a$  and  $Q_c$ . Panels (c) and (f) depict the surfaces plotted as a function of  $Q_a$  and  $Q_d$ . The superimposed red contour lines indicate the projection of the initial anion wavefunction density in the ground vibrational state.

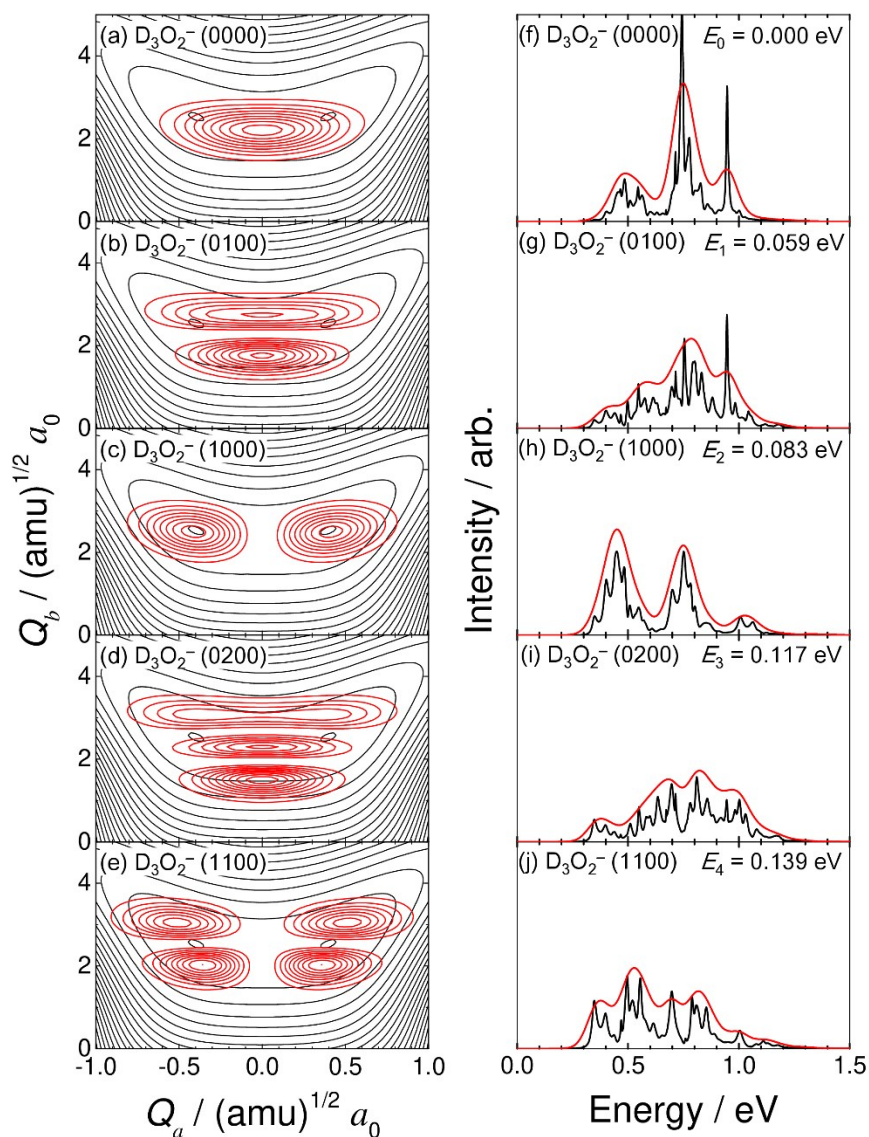

**Figure S4**

Left panels: vibrational wavefunction densities of the  $D_3O_2^-$  anion plotted as a function of  $Q_a$  and  $Q_b$  coordinates. The state can be described by a set of quantum numbers  $(v_a, v_b, v_c, v_d)$ , where  $v_a$ ,  $v_b$ ,  $v_c$ , and  $v_d$  are the vibrational quantum numbers for the  $Q_a$ ,  $Q_b$ ,  $Q_c$ , and  $Q_d$  coordinates, respectively. Right panels: photodetachment spectrum calculated using each vibrational wavefunction as an initial wave packet. The calculated spectra are plotted as a function of the energy defined by the neutral potential energy surface.
